# Supplementary material for: Allele-Independent Turnover of Human Leukocyte Antigen (HLA) Class Ia Molecules
Source: PubMed Central journal article supplement (PMC4987023; doi:10.1371/journal.pone.0161011), 2016-08-16
Supplement: pone.0161011.s003.pdf [file pone.0161011.s003.pdf]

S1 Table. Analysis of MHC-derived tryptic peptides from KG-1 cells.

| Molecule         | Sequence <sup>a</sup>     | Residues <sup>c</sup> | Calculated m/z | Observed m/z | z | Experiment 1 (p = 4.2%) <sup>a</sup> |       |               |       |                | Experiment 2 (p = 4.9%) <sup>a, d</sup> |           |       |           |       |                |                                    |
|------------------|---------------------------|-----------------------|----------------|--------------|---|--------------------------------------|-------|---------------|-------|----------------|-----------------------------------------|-----------|-------|-----------|-------|----------------|------------------------------------|
|                  |                           |                       |                |              |   | Unlabeled                            |       | Fully labeled |       |                | FSR (%/h, mean ± SEM) <sup>f</sup>      | Unlabeled |       | Labeled   |       |                | FSR (%/h, mean ± SEM) <sup>f</sup> |
|                  |                           |                       |                |              |   | Abundance                            | RMSD  | Abundance     | RMSD  | n <sup>g</sup> |                                         | Abundance | RMSD  | Abundance | RMSD  | n <sup>g</sup> |                                    |
| HLA-A30          | FDSDAASQR                 | 36-44                 | 498.72         | 498.72       | 2 | 2.79E+07                             | 0.18% | 5.30E+07      | 0.07% | 13             | 5.59 ± 0.56                             | 1.39E+08  | 0.25% | 7.87E+07  | 0.35% | 13             | 6.22 ± 0.41                        |
|                  | GYEQHAYDGK                | 112-121               | 584.26         | 584.26       | 2 | 7.11E+06                             | 1.80% | 5.95E+06      | 0.47% | 12             | 6.21 ± 0.64                             | 8.92E+06  | 0.47% | 8.00E+06  | 0.52% | 11             | 7.08 ± 0.57                        |
|                  | RAEQLR                    | 152-157               | 386.73         | 386.73       | 2 | 2.93E+07                             | 0.92% | 6.88E+07      | 0.57% | 7              | 5.29 ± 0.45                             | 1.41E+08  | 0.46% | 7.09E+07  | 0.42% | 7              | 5.67 ± 0.46                        |
|                  | SWATAADM[ox]AAQITQR       | 132-145               | 783.38         | 783.38       | 2 | 2.23E+07                             | 0.92% | 3.98E+07      | 0.16% | 16             | 5.84 ± 0.74                             | 2.25E+07  | 0.14% | 5.23E+07  | 0.31% | 18             | 4.50 ± 0.22                        |
|                  | APWIEQERPEYWDQETR         | 49-65                 | 745.02         | 745.02       | 2 | 5.71E+07                             | 0.52% | 1.30E+08      | 0.37% | 25             | 7.71 ± 0.58                             | 2.06E+08  | 2.19% | 1.71E+08  | 0.27% | 30             | 6.69 ± 0.32                        |
| HLA-A30          | KGSVYTAASSDSSAQSVDVSLTACK | 316-340               | 826.05         | 826.05       | 3 |                                      |       |               |       |                |                                         | 1.62E+07  | 0.53% | 3.52E+07  | 0.24% | 26             | 6.01 ± 0.49                        |
| HLA-B iso        | DGEDQTQDTELVEVTRPAGDR     | 220-239               | 744.68         | 744.68       | 2 | 3.37E+08                             | 0.36% | 3.70E+08      | 0.23% | 32             | 8.19 ± 0.33                             | 2.06E+08  | 0.34% | 1.68E+08  | 0.22% | 32             | 6.68 ± 0.32                        |
|                  | DYIALNEDLSSWTAADTAAQITQR  | 122-145               | 885.10         | 885.10       | 3 | 1.96E+07                             | 0.30% | 7.67E+07      | 0.20% | 31             | 6.43 ± 0.37                             | 3.95E+06  | 0.20% | 2.64E+07  | 0.25% | 33             | 5.21 ± 0.32                        |
|                  | GGSYSQAASSDSSAQSVDVSLTA   | 317-338               | 1023.45        | 1023.45      | 2 | 3.30E+07                             | 0.15% | 5.75E+07      | 0.35% | 26             | 6.58 ± 0.66                             | 1.60E+07  | 0.47% | 1.02E+07  | 0.40% | 27             | 5.96 ± 0.44                        |
| HLA-B78          | GHNQYAYDGK                | 112-121               | 576.76         | 576.76       | 2 | 1.94E+07                             | 0.18% | 1.85E+07      | 0.62% | 8              | 5.89 ± 0.57                             | 1.74E+07  | 0.31% | 1.40E+07  | 0.39% | 10             | 6.28 ± 0.77                        |
| HLA-B53          | (none found)              |                       |                |              |   |                                      |       |               |       |                |                                         |           |       |           |       |                |                                    |
| HLA-C iso        | GGSCSQAASSNSAQSDESLIACK   | 318-341               | 1186.52        | 1186.52      | 2 | 1.88E+06                             | 0.95% | 4.18E+06      | 0.25% | 29             | 7.05 ± 1.12                             | 7.88E+06  | 0.22% | 8.56E+06  | 0.14% | 31             | 9.09 ± 1.09                        |
| HLA-C4           | EPWVEQEGPEYWDR            | 49-62                 | 910.40         | 910.40       | 2 |                                      |       |               |       |                |                                         | 5.20E+06  | 1.21% | 2.39E+07  | 0.87% | 21             | 11.1 ± 0.67                        |
|                  | GYNQFAYDGK                | 112-121               | 581.76         | 581.76       | 2 |                                      |       |               |       |                |                                         | 3.50E+06  | 0.67% | 7.57E+06  | 0.03% | 9              | 10.3 ± 1.20                        |
| HLA-C16          | GVDQSAYDGK                | 112-121               | 552.24         | 552.24       | 2 | 2.83E+06                             | 0.49% | 7.90E+06      | 0.62% | 12             | 10.2 ± 1.28                             |           |       |           |       |                |                                    |
|                  | APWVEQEGPEYWDR            | 49-62                 | 881.40         | 881.40       | 2 |                                      |       |               |       |                |                                         | 1.61E+07  | 0.34% | 7.15E+07  | 0.38% | 23             | 10.8 ± 1.00                        |
| Cell growth rate |                           |                       |                |              |   |                                      |       |               |       |                | 1.90 ± 0.01                             |           |       |           |       |                | 2.55 ± 0.07                        |

**Notes:** <sup>a</sup> <sup>2</sup>H<sub>2</sub>O enrichment in media (average of samples), used as precursor pool enrichment (p) in MIDA models.

<sup>b</sup> Peptides were selected for allele- or isotype specificity, as described in text, and filtered to meet analytical criteria as described in Methods. Single-letter code ("ox" is M oxidation). The four N-terminal amino acids were used to identify the peptides in Fig. 3. Note that different peptides met analytical requirements in the two experiments (blanks = not detected or not suitable for analysis), yet fractional synthesis rates remained similar.

<sup>c</sup> Numbering from 1 = N terminus of mature polypeptide as specified in the IMGT/HLA database.

<sup>d</sup> Results from Experiment 2 are shown in Fig. 3.

<sup>e</sup> Number of labeling sites used in MIDA models. RMSD values are for deviations between modeled and observed mass isotopomer distributions.

<sup>f</sup> Fractional synthesis rate (per cent new protein per hour) calculated from curve fits for individual peptides. Peptides from the same allele or isotype yielded statistically indistinguishable values from one another (p > 0.05, F test), so pooled data were used in Fig. 3.
