# Supplementary material for: Allele-Independent Turnover of Human Leukocyte Antigen (HLA) Class Ia Molecules
Source: PubMed Central journal article supplement (PMC4987023; doi:10.1371/journal.pone.0161011), 2016-08-16
Supplement: pone.0161011.s004.pdf [file pone.0161011.s004.pdf]

S2 Table. Analysis of MHCI-derived tryptic peptides from LCL721 cells.

| Molecule  | Peptide Sequence <sup>a</sup>                             | Residues <sup>c</sup> | Notation <sup>a</sup> | Calculated m/z   | Observed m/z     | z | Experiment 1 (p = 5.11%) <sup>a</sup> |       |           |       |                | Experiment 2 (p = 4.50%) <sup>a</sup> |           |       |           |       |                |                        |
|-----------|-----------------------------------------------------------|-----------------------|-----------------------|------------------|------------------|---|---------------------------------------|-------|-----------|-------|----------------|---------------------------------------|-----------|-------|-----------|-------|----------------|------------------------|
|           |                                                           |                       |                       |                  |                  |   | Unlabeled                             |       | Labeled   |       |                | FSR (%/h) <sup>f</sup>                | Unlabeled |       | Labeled   |       |                | FSR (%/h) <sup>f</sup> |
|           |                                                           |                       |                       |                  |                  |   | Abundance                             | RMSD  | Abundance | RMSD  | n <sup>u</sup> |                                       | Abundance | RMSD  | Abundance | RMSD  | n <sup>u</sup> |                        |
| HLA-A1    | SWTAADM <sup>16</sup> AAQITK <sup>17</sup> [ox] in Expt 2 | 132-144               | SWTA                  | 697.34 / 705.34* | 697.33 / 705.22* | 2 | 1.11E+08                              | 0.63% | 1.14E+08  | 0.51% | 11             | 3.24 ± 0.20                           | 1.59E+07  | 1.48% | 4.81E+07  | 0.39% | 15             | 2.49 ± 0.30            |
|           | FDSDAASQK                                                 | 36-44                 |                       | 484.72           | 484.66           | 2 |                                       |       |           |       |                |                                       | 2.28E+07  | 0.82% | 1.04E+08  | 0.38% | 13             | 3.94 ± 0.24            |
|           | QDAYDVGKDYIALNEDLR                                        | 115-131               | QDAY                  | 666.99           | 666.97           | 3 | 4.65E+08                              | 0.38% | 5.08E+08  | 0.17% | 20             | 4.83 ± 0.14                           |           |       |           |       |                |                        |
|           | APWIEQEGPEYWDQETR                                         | 49-65                 |                       | 1067.480         | 1,067.40         | 2 |                                       |       |           |       |                |                                       | 1.17E+08  | 1.50% | 2.17E+08  | 0.40% | 23             | 5.34 ± 0.22            |
| HLA-A2    | RGGSYSQAASSDSSAQGSDVSLTACK                                | 316-340               | KGG-K                 | 821.38           | 821.37           | 3 | 8.26E+07                              | 0.76% | 1.10E+08  | 0.84% | 17             | 4.09 ± 0.34                           |           |       |           |       |                |                        |
|           | RGGSYSQAASSDSSAQGSDVSLTACKV                               | 316-341               | KGG-V                 | 854.40           | 854.40           | 3 | 2.50E+07                              | 0.87% | 7.41E+07  | 0.49% | 19             | 4.94 ± 0.41                           |           |       |           |       |                |                        |
|           | GYHQYAYDGDYIALK                                           | 112-127               | GYHQ                  | 476.99           | 476.99           | 4 | 1.58E+08                              | 0.43% | 2.32E+08  | 0.49% | 13             | 4.07 ± 0.23                           |           |       |           |       |                |                        |
|           | WEAAHVAEQLR                                               | 147-157               | WEAA                  | 437.23           | 437.23           | 3 | 1.13E+08                              | 2.22% | 1.04E+08  | 0.31% | 11             | 4.28 ± 0.29                           |           |       |           |       |                |                        |
|           | APWIEQEGPEYWDQETR                                         | 49-65                 | APWI                  | 688.31           | 688.30           | 3 | 2.59E+08                              | 0.50% | 2.49E+08  | 0.40% | 20             | 5.16 ± 0.20                           |           |       |           |       |                |                        |
|           | FDSDAASQR                                                 | 49-65                 |                       | 498.72           | 498.62           | 2 |                                       |       |           |       |                |                                       | 3.13E+07  | 0.60% | 1.11E+08  | 0.53% | 12             | 3.88 ± 0.10            |
| HLA-B8    | GHNQYAYDGDYIALNEDLR <sup>18</sup>                         | 112-131               | GHNQ 4+               | 589.53           | 589.53           | 4 | 4.92E+08                              | 0.92% | 2.98E+08  | 0.21% | 19             | 3.10 ± 0.51                           |           |       |           |       |                |                        |
|           | GHNQYAYDGDYIALNEDLR <sup>19</sup>                         | 112-131               | GHNQ 3+               | 785.71           | 785.70           | 3 | 1.33E+08                              | 1.02% | 1.09E+08  | 0.59% | 19             | 3.65 ± 0.19                           |           |       |           |       |                |                        |
| HLA-B51   | AYLEGLCVEWLR                                              | 158-169               | AYLE                  | 754.88           | 754.87           | 2 | 6.77E+08                              | 1.42% | 4.61E+08  | 0.44% | 10             | 5.03 ± 0.19                           | 1.56E+08  | 0.49% | 4.10E+08  | 0.31% | 12             | 3.76 ± 0.39            |
|           | GHNQYAYDGDYIALNEDLSSWTAADTAAQITQR                         | 112-145               | GHNQ                  | 947.45           | 947.44           | 4 | 2.15E+08                              | 0.37% | 1.94E+08  | 0.70% | 24             | 3.36 ± 0.52                           |           |       |           |       |                |                        |
|           | GGSYSQAASSDSSAQGSDVSLTA                                   | 317-338               | GGSY                  | 1,023.45         | 1,023.44         | 2 | 7.85E+07                              | 0.30% | 7.41E+07  | 0.85% | 15             | 2.94 ± 0.22                           | 6.49E+07  | 0.58% | 6.98E+07  | 0.59% | 24             | 2.25 ± 0.15            |
|           | DYIALNEDLSSWTAADTAAQITQR                                  | 122-145               |                       | 885.10           | 885.259          | 3 |                                       |       |           |       |                |                                       | 7.70E+07  | 0.97% | 3.59E+08  | 0.60% | 29             | 2.32 ± 0.23            |
| HLA-B iso | DGEDTQTDELVETRFAGDR                                       | 220-239               | DGED                  | 1,116.50         | 1,116.49         | 2 | 2.52E+08                              | 0.48% | 1.89E+08  | 0.18% | 24             | 3.85 ± 0.16                           |           |       |           |       |                |                        |
|           | APWIEQEGPEYWDR                                            | 49-62                 | APWI                  | 888.41           | 888.39           | 2 | 1.82E+09                              | 1.91% | 1.48E+09  | 0.28% | 17             | 4.55 ± 0.22                           | 5.23E+08  | 0.14% | 1.08E+09  | 0.36% | 21             | 3.79 ± 0.22            |
| HLA-C1    | WAAVM <sup>10x</sup> JVPSGEEQR                            | 244-256               | WAAV                  | 738.34           | 738.34           | 2 | 9.85E+07                              | 0.21% | 7.00E+07  | 0.82% | 14             | 6.56 ± 0.64                           |           |       |           |       |                |                        |
|           | YTCHVQHEGLPEPLTLR                                         | 257-273               | YTCH                  | 684.01           | 684.01           | 3 | 6.03E+07                              | 1.12% | 2.69E+07  | 0.85% | 13             | 5.88 ± 0.87                           |           |       |           |       |                |                        |
| HLA-C iso | APWVEQEGPEYWDR                                            | 49-62                 |                       | 881.40           | 881.320          | 2 |                                       |       |           |       |                |                                       | 5.58E+07  | 0.99% | 1.12E+08  | 0.33% | 19             | 7.82 ± 0.55            |

Notes: <sup>a</sup> <sup>2</sup>H<sub>2</sub>O enrichment in media (average of samples), used as precursor pool enrichment (p) in MIDA models.

<sup>b</sup> Peptides were selected for allele- or isotype specificity, as described in text, and filtered to meet analytical criteria as described in Methods. Single-letter code ("ox" refers to M oxidation)

Note that different peptides met analytical requirements in the two experiments (blanks = not detected or not suitable for analysis), yet fractional synthesis rates remained similar.

<sup>c</sup> Numbering from 1 = N terminus of mature polypeptide as specified in the IMGT/HLA database.

<sup>d</sup> Used in Fig 4 legend, where the results from Experiment 1 are shown in (A)-(C).

<sup>e</sup> Number of labeling sites used in MIDA models. RMSD values are for deviations between modeled and observed mass isotopomer distributions.

<sup>f</sup> Fractional synthesis rate (per cent new protein per hour). Peptides from the same allele or isotype yielded statistically indistinguishable values from one another (p > 0.05, F test). The pooled analysis is shown in Fig. 4.
