# Supplementary material for: Allele-Independent Turnover of Human Leukocyte Antigen (HLA) Class Ia Molecules
Source: PubMed Central journal article supplement (PMC4987023; doi:10.1371/journal.pone.0161011), 2016-08-16
Supplement: pone.0161011.s005.pdf [file pone.0161011.s005.pdf]

Table S3. Analysis of MHC-derived peptides from MoDCs.

| AS1 [A2, 3; B8, 41; C7, 17] <sup>a</sup> |          |                               |                         |           |   |           |                       |                                       |          |    |                      |                        |
|------------------------------------------|----------|-------------------------------|-------------------------|-----------|---|-----------|-----------------------|---------------------------------------|----------|----|----------------------|------------------------|
| Molecule                                 | Residues | Sequence <sup>b</sup>         | m/z (pred) <sup>c</sup> | m/z (obs) | z | Unlabeled |                       | 72 h labeled (p = 4.75%) <sup>e</sup> |          |    | k (%/h) <sup>f</sup> | k <sub>iso</sub> (%/h) |
|                                          |          |                               |                         |           |   | Abundance | RMSD (%) <sup>d</sup> | Abundance                             | RMSD (%) | n  |                      |                        |
| A2                                       | 98-108   | MYGCDVGS DWR                  | 673.27                  | 673.27    | 2 | 2.00E+07  | 0.41%                 | 1.42E+07                              | 0.40%    | 7  | 9.09 ± 1.15          | 9.62 ± 0.83            |
| A2                                       | 132-144  | SWTAADMAAQ TTK                | 691.32                  | 691.33    | 2 | 3.99E+07  | 0.68%                 | 2.20E+07                              | 0.35%    | 9  | 7.89 ± 2.07          |                        |
| A2                                       | 316-341  | KGGSYSQAASSDSAQGS DVS L TACKV | 854.40                  | 854.40    | 3 | 6.94E+06  | 0.29%                 | 1.16E+07                              | 0.17%    | 14 | 7.88 ± 2.08          |                        |
| A iso                                    | 76-82    | VDLG TLR                      | 387.23                  | 387.23    | 2 | 1.57E+08  | 0.61%                 | 1.13E+08                              | 1.55%    | 5  | 12.1 ± 0.85          |                        |
| A iso                                    | 36-44    | FSDAASQR                      | 498.72                  | 498.72    | 2 | 4.81E+06  | 0.43%                 | 1.33E+06                              | 0.48%    | 9  | 10.9 ± 2.41          |                        |
| B41                                      | 36-44    | FSDATSPR                      | 498.23                  | 498.23    | 2 | 2.09E+07  | 4.84%                 | 6.05E+05                              | 0.48%    | 10 | 10.6 ± 3.24          | 10.3 ± 0.86            |
| B iso                                    | 49-62    | APWIEQEGPEY WDR               | 888.41                  | 888.40    | 2 | 6.19E+07  | 0.17%                 | 4.88E+07                              | 0.38%    | 15 | 12.8 ± 1.15          |                        |
| B iso                                    | 220-239  | DGEDQTQDEL VETRPAGDR          | 1116.50                 | 1116.50   | 2 | 3.28E+06  | 0.37%                 | 2.77E+06                              | 0.76%    | 25 | 9.49 ± 1.61          |                        |
| B iso                                    | 317-338  | GGSYSQAACSDSAQGS DVS LTA      | 1059.95                 | 1059.95   | 2 | 1.09E+07  | 0.46%                 | 7.42E+06                              | 0.27%    | 13 | 9.01 ± 1.24          |                        |

  

| HD1 [A1, 2; B37, 49; Cw6, w7] <sup>a</sup> |          |                       |                         |           |   |                        |                       |                                       |          |    |                      |                        |
|--------------------------------------------|----------|-----------------------|-------------------------|-----------|---|------------------------|-----------------------|---------------------------------------|----------|----|----------------------|------------------------|
| Molecule                                   | Residues | Sequence <sup>b</sup> | m/z (pred) <sup>c</sup> | m/z (obs) | z | Unlabeled              |                       | 72 h labeled (p = 4.93%) <sup>e</sup> |          |    | k (%/h) <sup>f</sup> | k <sub>iso</sub> (%/h) |
|                                            |          |                       |                         |           |   | Abundance <sup>g</sup> | RMSD (%) <sup>d</sup> | Abundance                             | RMSD (%) | n  |                      |                        |
| A1                                         | 49-65    | APWIEQEGPEY W DQETR   | 1067.48                 | 1067.48   | 2 | 1.17E+07               |                       | 2.25E+07                              | 1.28%    | 20 | 5.78 ± 2.62          | 5.75 ± 1.00            |
| A2                                         | 98-108   | MYGCDVGS DWR          | 673.27                  | 673.27    | 2 | 5.95E+06               |                       | 1.82E+07                              | 0.97%    | 5  | 6.17 ± 1.04          |                        |
| A iso                                      | 22-35    | FLAVGYVDDT QFVR       | 815.42                  | 815.41    | 2 | 1.01E+08               |                       | 1.42E+08                              | 0.14%    | 7  | 5.23 ± 0.81          |                        |
| B iso                                      | 49-62    | APWIEQEGPEY WDR       | 888.41                  | 888.40    | 2 | 9.29E+06               |                       | 3.27E+07                              | 0.94%    | 13 | 7.23 ± 2.06          |                        |
| C iso                                      | 132-145  | SWTAADTAAQITQR        | 760.38                  | 760.38    | 2 | 2.25E+06               |                       | 5.44E+06                              | 1.10%    | 9  | 6.90 ± 2.43          |                        |

  

| HD2 [A2, 32; B35, 60 (*40:01); Cw4, w10 (*03:04)] <sup>a</sup> |          |                       |                         |           |   |                        |                       |                                       |          |    |                      |                        |
|----------------------------------------------------------------|----------|-----------------------|-------------------------|-----------|---|------------------------|-----------------------|---------------------------------------|----------|----|----------------------|------------------------|
| Molecule                                                       | Residues | Sequence <sup>b</sup> | m/z (pred) <sup>c</sup> | m/z (obs) | z | Unlabeled              |                       | 72 h labeled (p = 4.98%) <sup>e</sup> |          |    | k (%/h) <sup>f</sup> | k <sub>iso</sub> (%/h) |
|                                                                |          |                       |                         |           |   | Abundance <sup>g</sup> | RMSD (%) <sup>d</sup> | Abundance                             | RMSD (%) | n  |                      |                        |
| A2                                                             | 132-144  | SWTAADM[ox]AAQ TTK    | 699.32                  | 699.33    | 2 | 2.49E+06               |                       | 2.07E+06                              | 0.92%    | 8  | 6.35 ± 1.11          | 6.37 ± 0.46            |
| A32                                                            | 49-65    | APWIEQEGPEY W DQETR   | 1067.48                 | 1067.48   | 2 | 4.68E+06               |                       | 4.36E+06                              | 0.58%    | 17 | 5.50 ± 0.84          |                        |
| A32                                                            | 112-131  | GYQDAYDGDYIALNEDLR    | 783.03                  | 783.04    | 3 | 2.16E+07               |                       | 1.11E+07                              | 0.45%    | 21 | 7.51 ± 0.11          |                        |
| B35                                                            | 98-108   | MYGCDLGP DGR          | 620.76                  | 620.76    | 2 | 9.54E+06               |                       | 1.00E+07                              | 0.41%    | 7  | 17.5 ± 1.12          |                        |
| B60                                                            | 132-145  | SWTAADTAAQISQR        | 753.37                  | 753.37    | 2 | 1.89E+07               |                       | 5.10E+06                              | 0.37%    | 11 | 11.1 ± 2.13          |                        |

  

| HD3 [A2, 24; B27, 51; C14, 15] <sup>a</sup> |          |                       |                         |           |   |                        |                       |                                       |          |    |                      |                        |
|---------------------------------------------|----------|-----------------------|-------------------------|-----------|---|------------------------|-----------------------|---------------------------------------|----------|----|----------------------|------------------------|
| Molecule                                    | Residues | Sequence <sup>b</sup> | m/z (pred) <sup>c</sup> | m/z (obs) | z | Unlabeled              |                       | 72 h labeled (p = 4.16%) <sup>e</sup> |          |    | k (%/h) <sup>f</sup> | k <sub>iso</sub> (%/h) |
|                                             |          |                       |                         |           |   | Abundance <sup>g</sup> | RMSD (%) <sup>d</sup> | Abundance                             | RMSD (%) | n  |                      |                        |
| A iso                                       | 158-169  | AYLEGT CVDGLR         | 677.33                  | 677.33    | 2 | 7.75E+06               |                       | 5.60E+06                              | 0.69%    | 8  | 5.89 ± 2.21          | 5.89 ± 2.21            |
| B iso                                       | 49-62    | APWIEQEGPEY WDR       | 888.41                  | 888.40    | 2 | 8.21E+06               |                       | 1.62E+07                              | 0.28%    | 15 | 6.24 ± 1.69          | 6.24 ± 1.69            |

  

| HD4 [A3, 24; B7, 27; Cw2, w7] <sup>a</sup> |          |                               |                         |           |   |                        |                       |                                       |          |    |                      |                        |
|--------------------------------------------|----------|-------------------------------|-------------------------|-----------|---|------------------------|-----------------------|---------------------------------------|----------|----|----------------------|------------------------|
| Molecule                                   | Residues | Sequence <sup>b</sup>         | m/z (pred) <sup>c</sup> | m/z (obs) | z | Unlabeled              |                       | 72 h labeled (p = 5.08%) <sup>e</sup> |          |    | k (%/h) <sup>f</sup> | k <sub>iso</sub> (%/h) |
|                                            |          |                               |                         |           |   | Abundance <sup>g</sup> | RMSD (%) <sup>d</sup> | Abundance                             | RMSD (%) | n  |                      |                        |
| A3                                         | 316-341  | KGGSYTQAASSDSAQGS DVS L TACKV | 859.07                  | 859.08    | 3 | 1.10E+07               |                       | 2.53E+06                              | 0.21%    | 10 | 8.47 ± 1.61          | 7.80 ± 0.65            |
| A3                                         | 158-169  | AYLDGTCV E WLR                | 741.86                  | 741.86    | 2 | 4.11E+07               |                       | 6.52E+06                              | 0.48%    | 8  | 5.61 ± 0.86          |                        |
| A3                                         | 132-144  | SWTAADMAAQITK                 | 697.34                  | 697.34    | 2 | 2.96E+07               |                       | 4.96E+06                              | 0.32%    | 7  | 7.43 ± 1.49          |                        |
| A3                                         | 132-144  | SWTAADM[ox]AAQITK             | 705.34                  | 705.34    | 2 | 2.36E+07               |                       | 3.62E+06                              | 0.74%    | 8  | 6.01 ± 1.85          |                        |
| A3                                         | 115-131  | QDAYDGDYIALNEDLR              | 666.99                  | 666.99    | 3 | 6.15E+07               |                       | 1.02E+07                              | 0.30%    | 17 | 7.19 ± 1.00          |                        |
| A3                                         | 49-65    | APWIEQEGPEY W DQETR           | 1067.48                 | 1067.48   | 2 | 1.30E+07               |                       | 3.45E+06                              | 0.28%    | 17 | 6.35 ± 1.18          |                        |
| A24                                        | 158-169  | AYLEGT CVDGLR                 | 677.33                  | 677.33    | 2 | 2.91E+07               |                       | 6.56E+06                              | 0.19%    | 7  | 12.3 ± 2.27          |                        |
| A iso                                      | 22-35    | FLAVGYVDDT QFVR               | 815.42                  | 815.42    | 2 | 8.99E+07               |                       | 3.76E+07                              | 0.60%    | 7  | 11.1 ± 2.30          |                        |
| B7                                         | 112-131  | GHDQYAYDGDYIALNEDLR           | 786.03                  | 786.03    | 3 | 3.42E+07               |                       | 3.49E+06                              | 0.49%    | 16 | 13.6 ± 2.82          |                        |

|       |       |                |        |        |   |          |          |       |    |             |             |
|-------|-------|----------------|--------|--------|---|----------|----------|-------|----|-------------|-------------|
| B iso | 49-62 | APWIEQEGPEYWDR | 888.41 | 888.40 | 2 | 1.16E+08 | 4.09E+07 | 0.40% | 13 | 11.2 ± 1.53 | 12.9 ± 1.53 |
|-------|-------|----------------|--------|--------|---|----------|----------|-------|----|-------------|-------------|

HD4 [A3, 24; B7, 27; Cw2, w7] <sup>a</sup> (LPS-stimulated)

| Molecule | Residues | Sequence <sup>b</sup>      | m/z (pred) <sup>c</sup> | m/z (obs) | z | Unlabeled              |                       | 72 h labeled (p = 5.02%) <sup>e</sup> |          |    | k (%/h) <sup>f</sup> | k <sub>iso</sub> (%/h) |
|----------|----------|----------------------------|-------------------------|-----------|---|------------------------|-----------------------|---------------------------------------|----------|----|----------------------|------------------------|
|          |          |                            |                         |           |   | Abundance <sup>g</sup> | RMSD (%) <sup>d</sup> | Abundance                             | RMSD (%) | n  |                      |                        |
| A3       | 316-341  | KGGSYTQAASDSAQGSVDVSLTACKV | 859.07                  | 859.08    | 3 | 1.08E+07               |                       | 6.07E+07                              | 0.53%    | 10 | 4.41 ± 3.22          | 4.20 ± 0.99            |
| A3       | 158-169  | AYLDGTCVEWLR               | 741.86                  | 741.86    | 2 | 4.11E+07               |                       | 1.73E+08                              | 0.58%    | 6  | 2.95 ± 3.53          |                        |
| A3       | 132-144  | SWTAADM[ox]AAQITK          | 705.34                  | 705.34    | 2 | 2.34E+07               |                       | 6.59E+07                              | 0.74%    | 7  | 2.94 ± 4.67          |                        |
| A3       | 115-131  | QDAYDGKDYIALNEDLR          | 666.99                  | 666.99    | 3 | 5.75E+07               |                       | 1.89E+08                              | 0.50%    | 15 | 4.55 ± 1.43          |                        |
| A3       | 49-65    | APWIEQEGPEYWDQETR          | 1067.48                 | 1067.48   | 2 | 1.79E+07               |                       | 1.31E+08                              | 0.53%    | 16 | 3.91 ± 2.18          |                        |
| A24      | 158-169  | AYLEGTCDVGLR               | 677.33                  | 677.33    | 2 | 2.90E+07               |                       | 1.55E+08                              | 0.30%    | 7  | 5.75 ± 7.69          |                        |
| A24      | 316-341  | KGGSYSQAASDSAQGSVDVSLTACKV | 854.40                  | 854.40    | 3 | 4.25E+06               |                       | 4.93E+07                              | 0.45%    | 11 | 6.02 ± 3.36          |                        |
| A iso    | 22-35    | FLAVGYVDDTQFVR             | 815.42                  | 815.42    | 2 | 8.90E+07               |                       | 6.20E+08                              | 0.26%    | 6  | 4.45 ± 2.34          |                        |
| B27      | 22-35    | FLTVGYVDDTLFVR             | 822.94                  | 822.93    | 2 | 7.40E+07               |                       | 6.21E+08                              | 0.08%    | 5  | 4.95 ± 4.83          | 4.91 ± 2.06            |
| B iso    | 49-62    | APWIEQEGPEYWDR             | 888.41                  | 888.40    | 2 | 1.16E+08               |                       | 1.04E+09                              | 0.13%    | 12 | 4.86 ± 1.58          |                        |

HD5 [A2, 11; B27, 60 (\*40:01); Cw1, w10 (\*03:02)] <sup>a</sup>

| Molecule | Residues | Sequence <sup>b</sup>    | m/z (pred) <sup>c</sup> | m/z (obs) | z | Unlabeled              |                       | 72 h labeled (p = 4.78%) <sup>e</sup> |          |    | k (%/h) <sup>f</sup> | k <sub>iso</sub> (%/h) |
|----------|----------|--------------------------|-------------------------|-----------|---|------------------------|-----------------------|---------------------------------------|----------|----|----------------------|------------------------|
|          |          |                          |                         |           |   | Abundance <sup>g</sup> | RMSD (%) <sup>d</sup> | Abundance                             | RMSD (%) | n  |                      |                        |
| A2       | 49-65    | APWIEQEGPEYWDQETR        | 688.31                  | 688.31    | 3 | 8.29E+06               |                       | 5.61E+06                              | 0.43%    | 17 | 13.9 ± 1.68          | 9.51 ± 0.78            |
| A2       | 244-256  | WAARVVVPSGQEQQR          | 713.88                  | 713.88    | 2 | 4.63E+07               |                       | 9.79E+06                              | 0.53%    | 6  | 9.39 ± 1.85          |                        |
| A2       | 132-144  | SWTAADMAAQTTK            | 699.32                  | 699.32    | 2 | 4.61E+06               |                       | 2.45E+06                              | 0.40%    | 7  | 7.01 ± 1.30          |                        |
| A11      | 49-65    | APWIEQEGPEYWDQETR        | 1067.48                 | 1067.48   | 2 | 1.12E+07               |                       | 2.88E+06                              | 0.53%    | 16 | 6.92 ± 0.61          |                        |
| A11      | 115-131  | QDAYDGKDYIALNEDLR        | 666.99                  | 666.98    | 3 | 2.74E+07               |                       | 7.15E+06                              | 0.36%    | 18 | 9.62 ± 2.30          |                        |
| A iso    | 220-243  | DGEDQTQDTELVEVTRPAGDGTQK | 879.74                  | 879.74    | 3 | 8.02E+07               |                       | 4.20E+07                              | 0.21%    | 22 | 14.3 ± 2.59          | 12.1 ± 1.51            |
| B40      | 132-145  | SWTAADTAAQISQR (3+)      | 502.58                  | 502.58    | 3 | 2.61E+07               |                       | 4.77E+06                              | 0.34%    | 10 | 10.3 ± 2.79          |                        |
| B40      | 132-145  | SWTAADTAAQISQR (2+)      | 753.37                  | 753.37    | 2 | 4.99E+07               |                       | 6.05E+06                              | 0.26%    | 9  | 11.9 ± 2.90          |                        |
| B iso    | 220-239  | DGEDQTQDTELVEVTRPAGDR    | 744.67                  | 744.67    | 3 | 1.49E+08               |                       | 4.51E+07                              | 0.32%    | 23 | 14.0 ± 1.99          |                        |
| Cw1      | 112-131  | GYDQYAYDGKDYIALNEDLR     | 794.70                  | 794.73    | 3 | 6.15E+07               |                       | 4.51E+06                              | 0.55%    | 18 | 25.9 ± 7.26          | 23.7 ± 2.72            |
| C iso    | 132-145  | SWTAADTAAQITQR           | 760.38                  | 760.38    | 2 | 2.15E+07               |                       | 3.08E+06                              | 0.59%    | 9  | 25.4 ± 4.98          |                        |
| C iso    | 318-341  | GGSCSQAASNSAQQSDESLIACK  | 791.34                  | 791.34    | 3 | 4.87E+06               |                       | 7.93E+05                              | 0.40%    | 14 | 15.6 ± 4.71          |                        |
| C iso    | 257-273  | YTCHVQHGLPEPLTLR (3+)    | 684.01                  | 684.01    | 3 | 8.83E+06               |                       | 2.78E+06                              | 0.84%    | 10 | 34.8 ± 5.85          |                        |
| C iso    | 257-273  | YTCHVQHGLPEPLTLR (4+)    | 513.26                  | 513.26    | 4 | 4.50E+06               |                       | 6.47E+06                              | 0.35%    | 9  | 20.7 ± 6.35          |                        |

HD6 [A1, 24; B8, 27; Cw2, Cw7] <sup>a</sup>

| Molecule | Residues | Sequence <sup>b</sup>      | m/z (pred) <sup>c</sup> | m/z (obs) | z | Unlabeled              |                       | 72 h labeled (p = 5.11%) <sup>e</sup> |          |    | k (%/h) <sup>f</sup> | k <sub>iso</sub> (%/h) |
|----------|----------|----------------------------|-------------------------|-----------|---|------------------------|-----------------------|---------------------------------------|----------|----|----------------------|------------------------|
|          |          |                            |                         |           |   | Abundance <sup>g</sup> | RMSD (%) <sup>d</sup> | Abundance                             | RMSD (%) | n  |                      |                        |
| A1       | 115-131  | QDAYDGKDYIALNEDLR          | 666.99                  | 666.99    | 3 | 7.36E+07               |                       | 4.98E+07                              | 0.34%    | 20 | 7.23 ± 0.29          | 10.7 ± 1.26            |
| A24      | 36-44    | FSDAASQR                   | 498.72                  | 498.72    | 2 | 5.96E+07               |                       | 1.32E+07                              | 0.39%    | 10 | 10.9 ± 4.33          |                        |
| A24      | 49-66    | APWIEQEGPEYWDDEETGK        | 1082.48                 | 1082.479  | 2 | 2.33E+07               |                       | 1.42E+07                              | 0.55%    | 21 | 14.4 ± 2.97          |                        |
| A24      | 316-341  | KGGSYSQAASDSAQGSVDVSLTACKV | 854.40                  | 854.40    | 3 | 8.91E+06               |                       | 3.60E+07                              | 0.60%    | 17 | 8.14 ± 2.98          |                        |
| A iso    | 22-35    | FLAVGYVDDTQFVR             | 815.42                  | 815.42    | 2 | 1.91E+08               |                       | 1.94E+08                              | 0.23%    | 9  | 13.6 ± 4.12          |                        |
| A iso    | 220-243  | DGEDQTQDTELVEVTRPAGDGTQK   | 879.74                  | 879.74    | 3 | 2.08E+08               |                       | 2.49E+08                              | 0.42%    | 26 | 12.6 ± 2.49          |                        |
| B8       | 7-17     | YFDTAM[ox]SRPGR            | 658.81                  | 658.81    | 2 | 9.63E+06               |                       | 4.20E+06                              | 0.38%    | 12 | 9.79 ± 2.30          | 13.1 ± 1.26            |
| B8       | 171-181  | YLENGKDTLRLR               | 669.34                  | 669.34    | 2 | 4.81E+07               |                       | 6.29E+06                              | 0.71%    | 9  | 20.2 ± 5.03          |                        |
| B8       | 112-131  | GHNQYAYDGKDYIALNEDLR       | 785.71                  | 785.71    | 3 | 3.67E+07               |                       | 3.92E+07                              | 0.38%    | 16 | 10.7 ± 2.06          |                        |
| B27      | 22-35    | FLTVGYVDDTLFVR             | 822.94                  | 822.94    | 2 | 1.72E+08               |                       | 1.22E+08                              | 0.43%    | 8  | 18.3 ± 6.48          |                        |
| B iso    | 49-62    | APWIEQEGPEYWDR             | 592.61                  | 592.61    | 3 | 7.65E+06               |                       | 7.26E+06                              | 0.88%    | 15 | 9.46 ± 1.70          |                        |
| B iso    | 220-239  | DGEDQTQDTELVEVTRPAGDR      | 744.67                  | 744.68    | 3 | 3.29E+08               |                       | 2.40E+08                              | 0.23%    | 25 | 14.1 ± 2.98          |                        |

HD7 [A24, 30; B13, 27; Cw2, w6] <sup>a</sup>

|  |  |  |  |  |  | Unlabeled | 72 h labeled (p = 4.76%) <sup>e</sup> |  |  |  |  |
|--|--|--|--|--|--|-----------|---------------------------------------|--|--|--|--|
|--|--|--|--|--|--|-----------|---------------------------------------|--|--|--|--|

| Molecule | Residues | Sequence <sup>b</sup>   | m/z (pred) <sup>c</sup> | m/z (obs) | z | Abundance <sup>g</sup> | RMSD (%) <sup>d</sup> | Abundance | RMSD (%) | n  | k (%/h) <sup>f</sup> | k <sub>iso</sub> (%/h) |
|----------|----------|-------------------------|-------------------------|-----------|---|------------------------|-----------------------|-----------|----------|----|----------------------|------------------------|
| A iso    | 36-44    | FSDSAASQR               | 498.72                  | 498.73    | 2 | 6.29E+07               |                       | 2.62E+06  | 0.59%    | 8  | 12.4 ± 3.02          | 14.4 ± 1.93            |
| A iso    | 220-243  | DGEDTQDTELVETRPAGDGTFOK | 879.74                  | 879.75    | 3 | 5.00E+07               |                       | 1.70E+08  | 0.46%    | 23 | 16.4 ± 2.86          |                        |
| B13      | 22-35    | FITVGYVDDTQFVR          | 830.42                  | 830.43    | 2 | 7.61E+07               |                       | 1.28E+08  | 0.24%    | 7  | 11.9 ± 1.22          | 11.5 ± 1.32            |
| B27      | 22-35    | FITVGYVDDTLFVR          | 822.94                  | 822.95    | 2 | 5.64E+07               |                       | 6.79E+07  | 0.36%    | 7  | 12.4 ± 0.60          |                        |
| B iso    | 49-62    | APWIEQEGPEYWR           | 888.41                  | 888.42    | 2 | 9.30E+07               |                       | 2.66E+07  | 0.29%    | 13 | 13.3 ± 3.55          |                        |
| B iso    | 220-239  | DGEDTQDTELVETRPAGDR     | 1116.50                 | 1116.52   | 2 | 2.92E+07               |                       | 9.29E+06  | 0.57%    | 22 | 7.99 ± 2.69          |                        |

| HD8 [A2, A2, B15, B35, C10 (*0302), C4] <sup>a</sup> |          |                           |                         |           |   |           |                       |                                       |          |    |                      |                        |
|------------------------------------------------------|----------|---------------------------|-------------------------|-----------|---|-----------|-----------------------|---------------------------------------|----------|----|----------------------|------------------------|
| Molecule                                             | Residues | Sequence <sup>b</sup>     | m/z (pred) <sup>c</sup> | m/z (obs) | z | Unlabeled |                       | 72 h labeled (p = 4.96%) <sup>e</sup> |          |    | k (%/h) <sup>f</sup> | k <sub>iso</sub> (%/h) |
|                                                      |          |                           |                         |           |   | Abundance | RMSD (%) <sup>d</sup> | Abundance                             | RMSD (%) | n  |                      |                        |
| A2                                                   | 317-340  | GGSYSQAASSDSAQGSVDVSLTACK | 1167.51                 | 1167.52   | 2 | 2.46E+06  | 1.61%                 | 4.37E+06                              | 0.28%    | 14 | 9.00 ± 6.29          | 11.0 ± 1.80            |
| A2                                                   | 220-243  | DGEDTQDTELVETRPAGDGTFOK   | 879.74                  | 879.74    | 3 | 1.40E+08  | 0.06%                 | 1.16E+09                              | 0.63%    | 21 | 12.7 ± 2.82          |                        |
| B15                                                  | 152-157  | EAEQWR                    | 409.69                  | 409.70    | 2 | 1.27E+07  | 1.82%                 | 2.88E+08                              | 0.50%    | 7  | 11.7 ± 4.02          | 14.3 ± 1.46            |
| B iso                                                | 49-62    | APWIEQEGPEYWR             | 888.41                  | 888.41    | 2 | 1.98E+08  | 0.17%                 | 3.25E+09                              | 0.56%    | 12 | 14.3 ± 2.14          |                        |
| B iso                                                | 317-338  | GGSYSQAASSDSAQGSVDVSLTA   | 1023.45                 | 1023.46   | 2 | 4.59E+07  | 4.20%                 | 5.75E+08                              | 0.55%    | 13 | 18.2 ± 1.30          |                        |
| B iso                                                | 220-239  | DGEDTQDTELVETRPAGDR       | 744.67                  | 744.68    | 3 | 2.51E+08  | 0.16%                 | 6.03E+09                              | 0.83%    | 19 | 14.2 ± 2.61          |                        |
| C10                                                  | 18-35    | GEPHFIAVGYVDDTQFVR        | 684.01                  | 684.01    | 3 | 1.40E+07  | 1.39%                 | 1.62E+08                              | 0.14%    | 13 | 14.9 ± 5.31          | 15.9 ± 2.52            |
| C iso                                                | 122-131  | DYIALNEDLR                | 611.31                  | 611.31    | 2 | 4.31E+06  | 2.11%                 | 3.06E+07                              | 0.31%    | 12 | 15.6 ± 5.43          |                        |
| C iso                                                | 132-145  | SWTAADTAAQITQR            | 760.38                  | 760.38    | 2 | 1.44E+07  | 0.31%                 | 1.72E+08                              | 0.17%    | 13 | 15.2 ± 1.56          |                        |
| C iso                                                | 256-273  | YTCHVQHEGLPEPLTLR         | 684.01                  | 684.01    | 3 | 5.19E+06  | 1.41%                 | 8.48E+07                              | 0.40%    | 12 | 18.8 ± 12.3          |                        |

| HD8 [A2, A2, B15, B35, C10 (*0302), C4] <sup>a</sup> (LPS stimulated) |          |                         |                         |           |   |           |                       |                                       |          |    |                      |                        |
|-----------------------------------------------------------------------|----------|-------------------------|-------------------------|-----------|---|-----------|-----------------------|---------------------------------------|----------|----|----------------------|------------------------|
| Molecule                                                              | Residues | Sequence <sup>b</sup>   | m/z (pred) <sup>c</sup> | m/z (obs) | z | Unlabeled |                       | 72 h labeled (p = 4.65%) <sup>e</sup> |          |    | k (%/h) <sup>f</sup> | k <sub>iso</sub> (%/h) |
|                                                                       |          |                         |                         |           |   | Abundance | RMSD (%) <sup>d</sup> | Abundance                             | RMSD (%) | n  |                      |                        |
| A2                                                                    | 49-65    | APWIEQEGPEYWDGETR       | 1031.96                 | 1031.97   | 2 | 1.92E+08  | 0.67%                 | 6.55E+07                              | 0.81%    | 9  | 6.87 ± 0.65          | (5.18 ± 0.88)          |
| A2                                                                    | 220-243  | DGEDTQDTELVETRPAGDGTFOK | 879.74                  | 879.74    | 3 | 8.20E+08  | 0.11%                 | 5.61E+07                              | 0.50%    | 28 | 3.58 ± 0.60          | (p = 0.031)            |
| B15                                                                   | 152-157  | EAEQWR                  | 409.69                  | 409.70    | 2 | 1.62E+08  | 0.75%                 | 6.77E+06                              | 0.39%    | 8  | 4.15 ± 0.69          | 4.49 ± 0.90            |
| B35                                                                   | 98-108   | MYGCDLGPDGR             | 620.76                  | 620.76    | 2 | 5.16E+07  | 2.11%                 | 1.01E+07                              | 0.86%    | 6  | 4.54 ± 4.43          |                        |
| B iso                                                                 | 49-62    | APWIEQEGPEYWR           | 888.41                  | 888.41    | 2 | 1.58E+09  | 0.08%                 | 1.43E+08                              | 0.41%    | 15 | 4.65 ± 0.83          |                        |
| B iso                                                                 | 220-239  | DGEDTQDTELVETRPAGDR     | 744.67                  | 744.68    | 3 | 2.05E+09  | 0.18%                 | 1.13E+08                              | 0.78%    | 24 | 4.64 ± 0.75          |                        |
| C10                                                                   | 18-35    | GEPHFIAVGYVDDTQFVR      | 684.01                  | 684.01    | 3 | 9.59E+07  | 1.54%                 | 9.69E+06                              | 1.00%    | 12 | 8.54 ± 1.09          | 9.06 ± 0.72            |
| C iso                                                                 | 122-131  | DYIALNEDLR              | 611.31                  | 611.31    | 2 | 5.40E+07  | 1.05%                 | 4.33E+06                              | 0.88%    | 13 | 10.1 ± 1.65          |                        |
| C iso                                                                 | 132-145  | SWTAADTAAQITQR          | 760.38                  | 760.38    | 2 | 1.13E+08  | 0.48%                 | 9.41E+06                              | 0.16%    | 15 | 8.58 ± 1.48          |                        |

- Notes:**
- <sup>a</sup> HLA types: given as serotypes (numerically equivalent to 2-digit genotypes except where noted in parentheses, in *italics*).
- By default, the 4-digit subtypes most prevalent in Caucasians were used for alignments (usually \*xx:01). B27 was assumed to be B\*27:05.
- <sup>b</sup> All peptides used for kinetic analysis are shown (single-letter code). Residue numbering is based on the mature protein sequence, with signal sequence cleavage as per the IMGT/HLA database.
- <sup>c</sup> m/z: mass to charge ratio, predicted from monoisotopic elemental masses or observed in Orbitrap mass spectra as indicated. Abundances were summed over all mass isotopomers used in the analysis.
- <sup>d</sup> RMSD, root mean square deviation of observed mass isotopomer distributions, as compared with MIDA models.
- <sup>e</sup> "p" represents measured 2H<sub>2</sub>O enrichment in media. "n", number of labeling sites that yields best fit to MIDA models at this enrichment.
- <sup>f</sup> "k" represents fractional synthesis rates (% per hour, mean ± SE) based on single-exponential curve fit to data. "k<sub>iso</sub>" represents pooled data for isotypes shown in Figs 5-8. Where k<sub>iso</sub> values are shown in parentheses, the k values for individual peptides were significantly different (p value shown, F test).
- <sup>g</sup> Abundances in *italics* / RMSD blank: some unlabeled sample data acquired at 30,000 resolution, resulting in bias (R.B. et al., unpublished data). Where abundances are in plain font reported and RMSD values are given, mass spectra were acquired at 7,500 resolution. For consistency, fractional synthesis rates for all MoDC samples were calculated using the unlabeled MIDA model for baseline subtraction. (Where available, baseline subtraction using unlabeled data acquired at 7,500 resolution yielded similar results.)
